# Supplementary material
Source: PubMed Central journal article supplement (PMC7509984)
Supplement: NIHMS1629814-supplement-1.pdf [file NIHMS1629814-supplement-1.pdf]

## Supplementary Appendix

This appendix has been provided by the authors to give readers additional information about their work.

Supplement to: Barnes AM, Chang W, Morello R, et al. Deficiency of cartilage-associated protein in recessive lethal osteogenesis imperfecta. *N Engl J Med* 2006;355:2757-64.

## **APPENDIX**

### **Study Population**

Proband dermal fibroblasts were collected under an IRB-approved protocol at the NICHD, NIH. These had been previously determined to synthesize type I collagen with overmodification along the full length of the alpha chains. The full-length cDNA for both type I collagen chains had been sequenced and no collagen structural mutation had been identified.

### **Cell Culture**

Human dermal fibroblasts were cultured in Dulbecco's modified Eagle's medium (Invitrogen, Carlsbad, CA) supplemented with 10% fetal bovine serum (FBS), 2 mM L-glutamine, 100 U/ml penicillin and 100  $\mu$ g/ml streptomycin. Conditioned media for 3-hydroxylation, differential scanning calorimetry and amino acid chromatography studies were prepared by incubating confluent fibroblasts for 24 hr in DMEM supplemented by 0.1% FBS, 50  $\mu$ g/ml ascorbic acid, L-glutamine, penicillin and streptomycin, and collecting with protease inhibitors.

### **Mutation Detection**

Genomic DNA (gDNA) for CRTAP exons 2-7 and surrounding intronic sequences was amplified by standard polymerase chain reaction (Invitrogen); exon 1 was amplified with 2 primer pairs using a GC-rich PCR system (Roche, Basel, Switzerland). Mutations identified by sequencing<sup>26</sup> were confirmed in patient and parental fibroblast gDNA by restriction enzyme digestion.

### **mRNA Levels and Alternatively Spliced Transcripts**

Total RNA from fibroblasts was harvested using TRI Reagent (Molecular Research Center, Inc., Cincinnati, OH).<sup>27</sup> For Real-Time RT-PCR (Assays-on-Demand, Applied Biosystems, Foster City, CA), standard curves for CRTAP and GAPDH were established using total RNA from a normal fibroblast control line (ATCC2127). Relative quantities of CRTAP and GAPDH were determined in triplicate control and patient assays using the standard curves; these values were used to calculate the

ratio of CRTAP:GAPDH for each sample. We normalized the CRTAP:GAPDH ratio of the patients to that of control cells. For patients, we assayed two independent total RNA samples in triplicate. The cultured fibroblasts of Infant 1 were treated with with 100  $\mu$ g/ml cycloheximide, prior to RT-PCR amplification of CRTAP mRNA using Titan One Tube RT-PCR Kit (Roche) with primers complementary to exons 1 and 7, respectively.

#### ***In vitro* Biochemical Studies**

For CRTAP protein analysis, fibroblasts were lysed in modified Radioimmunoprecipitation buffer (RIPA; 50mM Tris, pH 7.4, 1% NP-40, 150mM NaCl, 0.25% Na-deoxycholate) supplemented with a protease inhibitor cocktail. SDS-polyacrylamide gels of fractionated lysates were electroblotted onto nitrocellulose membranes (Bio-Rad, Hercules, CA) and blocked with 5% non-fat powdered milk prior to antibody probing. To study collagen modification, confluent fibroblasts were labeled overnight in serum-free media containing 260  $\mu$ Ci/ml [ $^3$ H]-proline. Procollagen was precipitated from both media and cell lysates prior to pepsin digestion and electrophoresis<sup>24</sup>. Differential scanning calorimetry was performed from 10-50  $^{\circ}$ C at 0.125 and 1  $^{\circ}$ C/minute heating rates in a NanoII DSC instrument (Calorimetry Sciences Corporation, Lindon, UT). Amino acid chromatography was performed by high pressure liquid chromatography (Commonwealth Biotechnologies, Inc., Richmond, VA).

For determination of prolyl 3-hydroxylation, media from stimulated cultures were acidified and digested with pepsin at 4  $^{\circ}$ C for 24 hrs. Collagens were precipitated at 1.0 M NaCl and resolved by SDS-PAGE. The  $\alpha$ 1(I) band was excised from the gel and subjected to in-gel trypsin digestion.<sup>28</sup> Electrospray mass spectrometry was performed on the tryptic peptides using an LCQ Deca XP ion-trap mass spectrometer equipped with in-line liquid chromatography (ThermoFinnigan, Waltham,

MA), using a C8 capillary column (300  $\mu\text{m}$  x 150 mm; Grace Vydac 208MS5.315) eluted at 4.5  $\mu\text{l}$  per min.

## FIGURE LEGENDS

### **Supplementary Figure 1. CRTAP mutations in Recessive Lethal Osteogenesis Imperfecta**

Panel A1 shows a homozygous splice site defect in Infant 1. Restriction digestion with MwoI confirms that the parents (C, control; F, father; P, proband; M, mother) are heterozygous for the mutation, as evidenced by presence of 74 and 42 bp fragments from mutant allele as well as a 116 bp fragment from the normal allele. Panel A2 shows the structure of 4 alternatively spliced forms of the *CRTAP* transcript in Infant 1, determined by sequencing of subcloned RT-PCR products from total RNA of cycloheximide-treated cells. The premature stop codon resulting from abnormal splicing is underlined. Panel B shows a homozygous point mutation in Infant 2, and confirmation of the HpyCH4 III restriction site eliminated by the mutation. Panel C displays both parental alleles in Infant 3. C1 shows heterozygosity for the start codon mutation and confirms its presence in child and father by NlaIV digestion. C2 shows sequences of subclones separating normal exon 1 and the allele containing the 16 nt duplication. Digestion with HpaII confirms the maternal origin of the duplication.

### **Supplementary Figure 2. Biochemical Studies of Type I Collagen.**

Panel A shows a tracing of the fragmentation spectra of the peptide containing Pro986. The b and y ions correspond to the N-terminal (b) and C-terminal (y) daughter ions. Daughter ion y6 localizes the extra 16 mass units to the C-terminal 6 amino acids containing the known Pro986 site of 3-hydroxylation. Panel B contains the thermograms of collagen melting by differential scanning calorimetry. The  $T_m$  of each infant's collagen is increased about 1 °C because of overmodification, but there is no lower stability peak indicative of a collagen structural defect.

## REFERENCES

1. Sanger F, Nicklen S, Coulson AR. DNA sequencing with chain-terminating inhibitors. 1977. *Biotechnology* 1992; 24:104-8.
2. Chomczynski P, Sacchi N. Single-step method of RNA isolation by acid guanidinium thiocyanate-phenol-chloroform extraction. *Anal Biochem* 1987; 162:156-9.
3. Bonadio J, Holbrook KA, Gelinas RE, Jacob J, Byers PH. Altered triple helical structure of type I procollagen in lethal perinatal osteogenesis imperfecta. *J Biol Chem* 1985; 260:1734-42.
4. Hanna SL, Sherman NE, Kinter MT, Goldberg JB. Comparison of proteins expressed by *Pseudomonas aeruginosa* strains representing initial and chronic isolates from a cystic fibrosis patient: an analysis by 2-D gel electrophoresis and capillary column liquid chromatography-tandem mass spectrometry. *Microbiology* 2000; 146 (Pt 10):2495-508.

**Supplementary Table 1:** Modified Sillence classification of Osteogenesis Imperfecta

| Type | Severity              | Clinical Features                                                          | Growth Impairment | Blue Sclera       | Dentinogenesis Imperfecta     | Deafness | Inheritance            |
|------|-----------------------|----------------------------------------------------------------------------|-------------------|-------------------|-------------------------------|----------|------------------------|
| I    | Mild                  | Few fractures, little bowing of long bones                                 | Little to none    | Present           | A: DI absent<br>B: DI present | Some     | AD                     |
| II   | Perinatal Lethal      | Many perinatal fractures, severe bowing of long bones, undermineralization | —                 | Present           | —                             | —        | AD, parental mosaicism |
| III  | Progressive Deforming | Moderate to severe limb bowing, many fractures                             | Severe            | Variable          | Common                        | Common   | AD                     |
| IV   | Moderate              | Mild to moderate bowing of long bones, fractures                           | Moderate          | Present or absent | A: DI absent<br>B: DI present | Some     | AD                     |

Modified from the original Sillence classification<sup>2</sup>

### A1. IVS1+1 G>C

TTACTTCAAG c c a a g t c c g c c

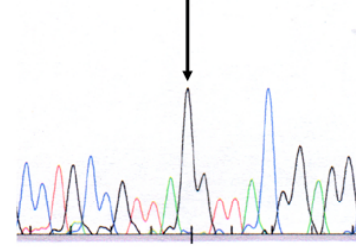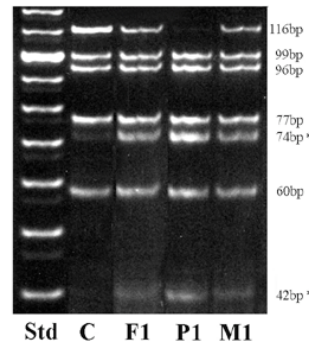

### A2.

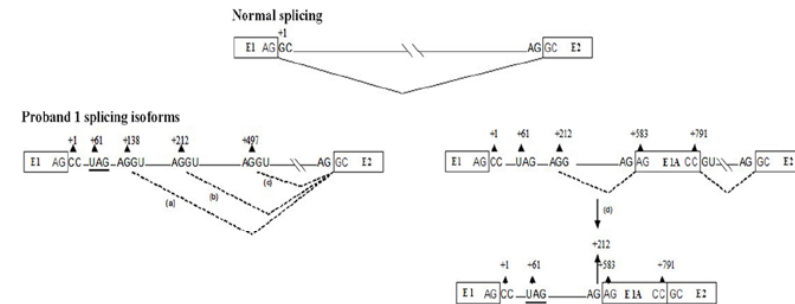

### B. Gln276Stop

ATGCAAAATATA GT GT GAAGA

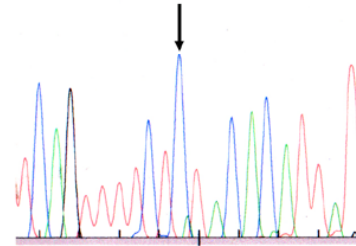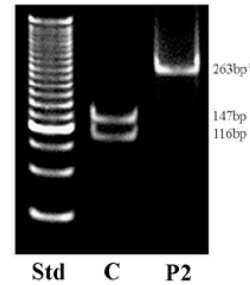

### C1. Methionine1 > Isoleucine

c g g g c g c g ATA GAG CCGGGG

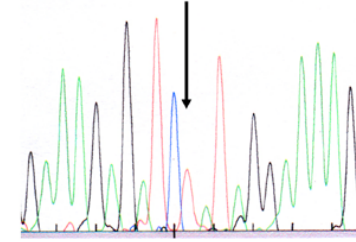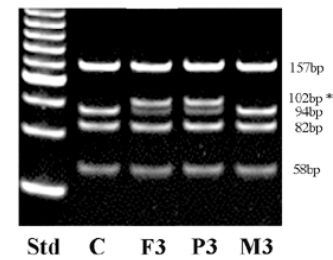

### C2. 16nt duplication in exon 1

GC GCCGCAGCCCGAGCCCGCCGCCGG

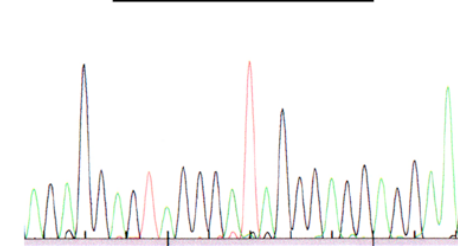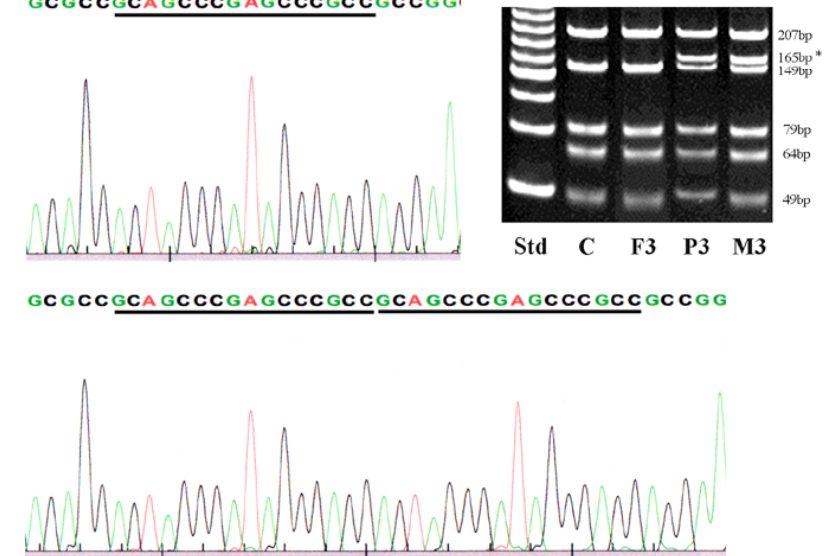

Supplementary Figure 1

**A.**

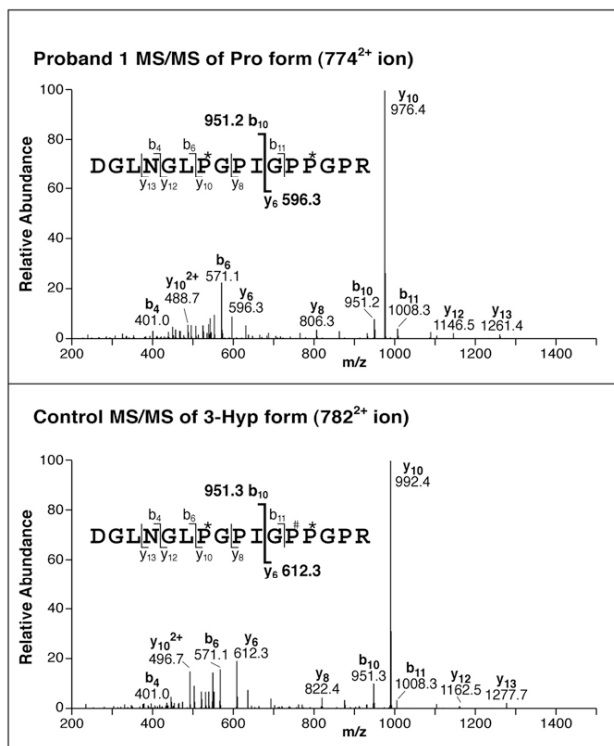

**B.**

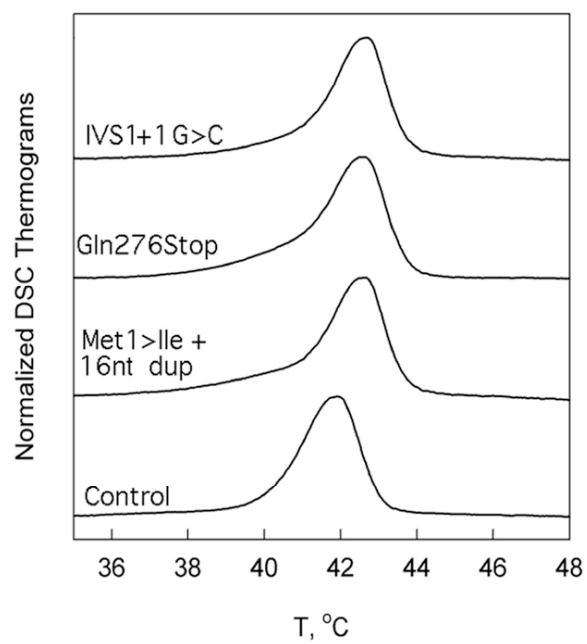

Supplementary Figure 2
